# Supplementary material for: Analysis of Microplastics in Takeaway Food Containers in China Using FPA-FTIR Whole Filter Analysis
Source: Molecules. 2022 Apr 20;27(9):2646. doi: 10.3390/molecules27092646 (PMC9103929; doi:10.3390/molecules27092646)
Supplement: Supplementary file 1 [file molecules-27-02646-s001.zip › molecules-1683739-supplementary.pdf]

## Supporting information

### Microplastic in takeaway food containers in China using FPA-FTIR whole filter analysis

Xue-jun Zhou\*, Jin Wang, Jie-Fang Ren

Zhe Jiang Institute of Product Quality and Safety Science, Hangzhou, Zhe Jiang, 310018, China.

E-mail: [23554243@qq.com](mailto:23554243@qq.com) Telephone: 86-0571-85798712

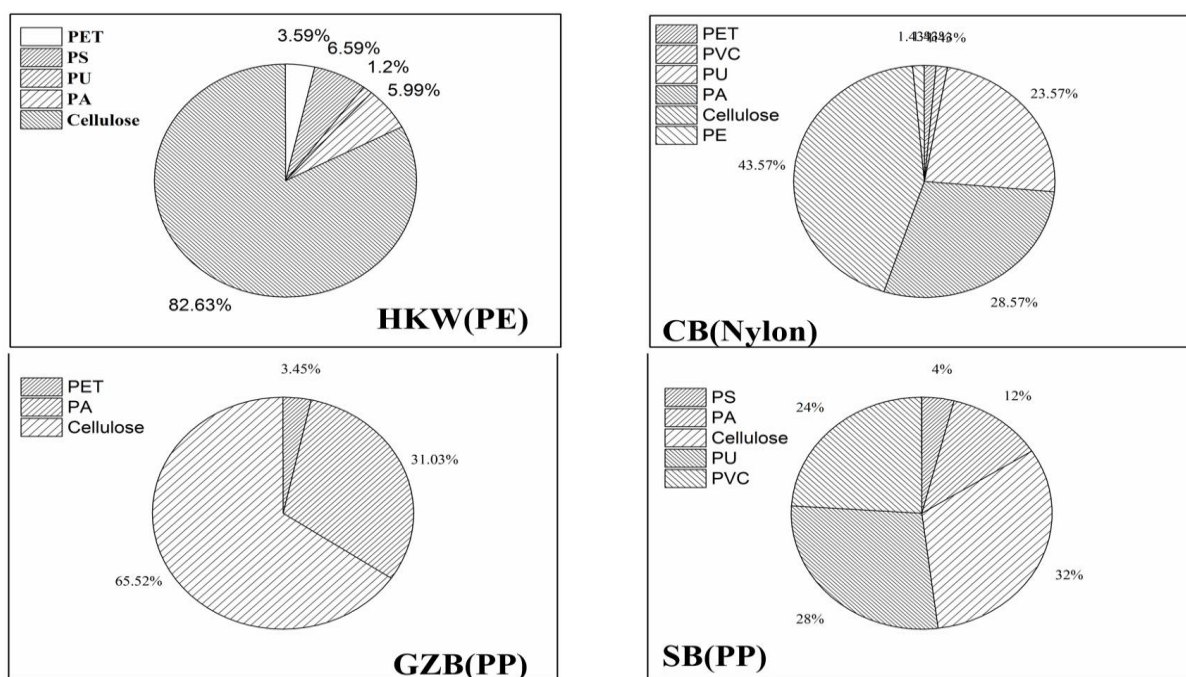

Figure S1. Chemical compositions of microplastics from takeaway food containers (HKW, CB, GZB SB).

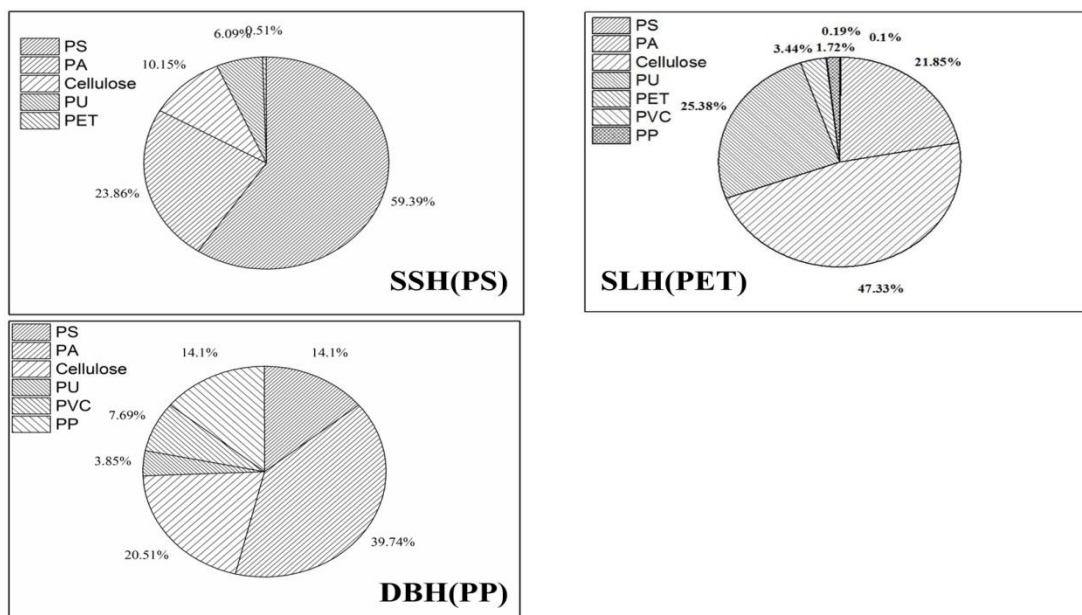

Figure S2. Chemical compositions of microplastics from takeaway food containers (SSH, SLH, DBH).

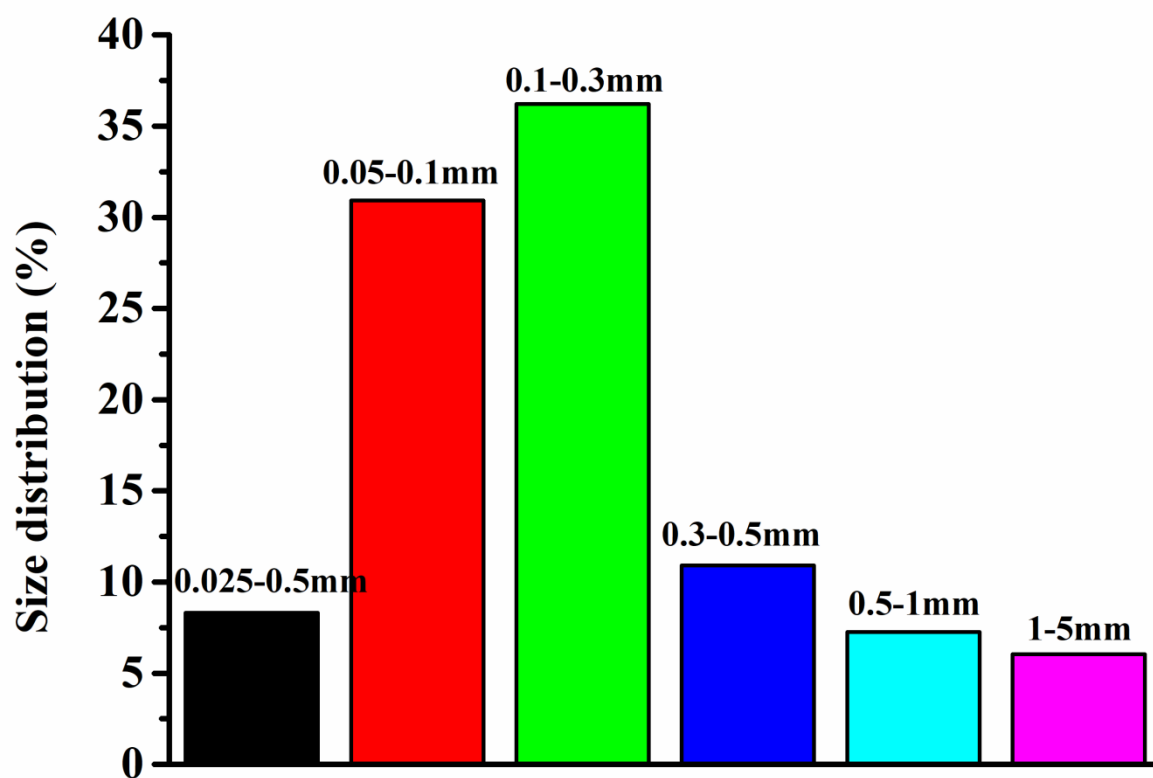

Figure S3. Size distribution histogram of all samples together

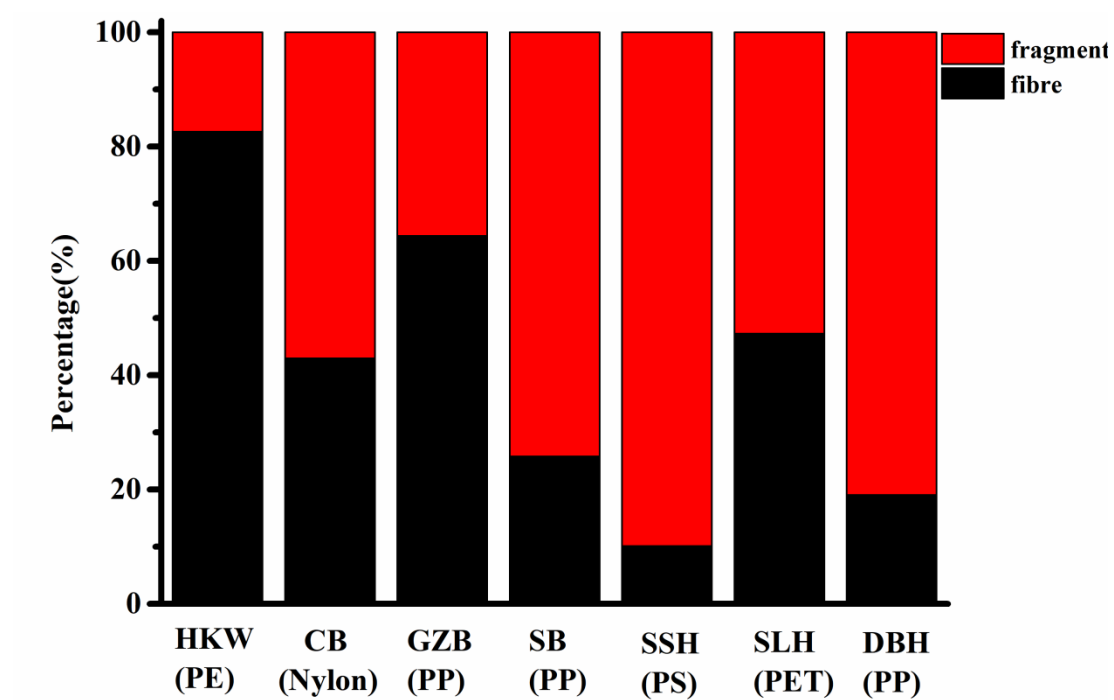

Figure S4. Distribution of microplastic types from takeaway food containers.

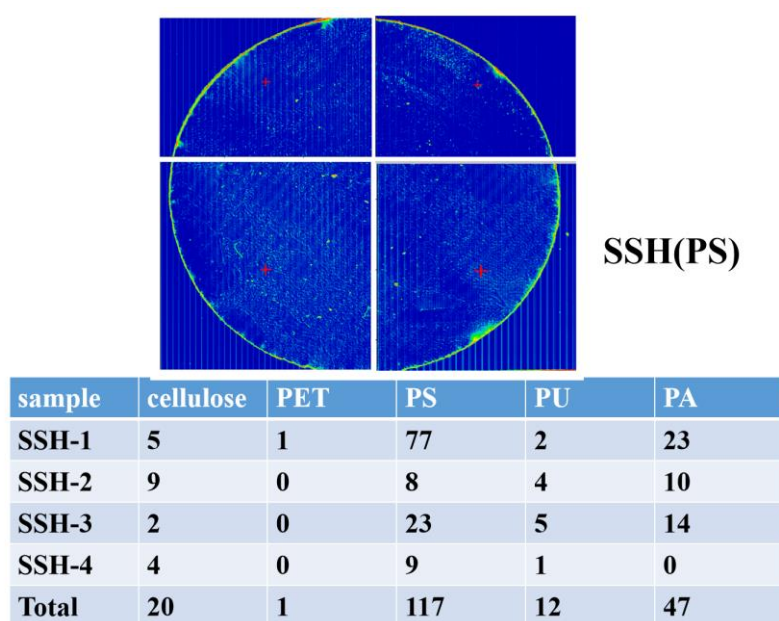

Figure S5. False color images of the entire membrane filter of an SSH(PS) sample.

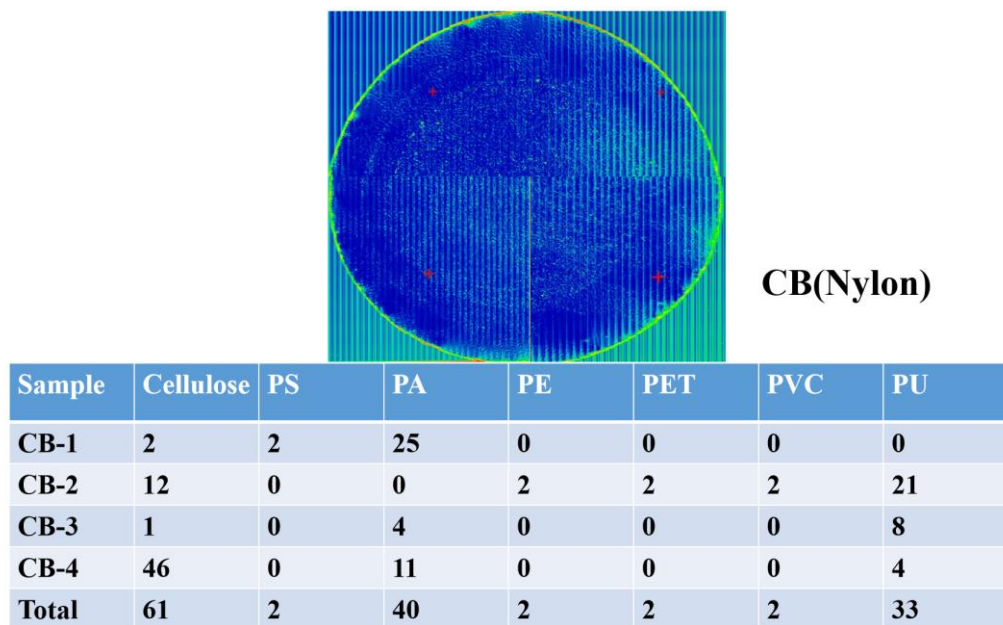

Figure S6. False color images of the entire membrane filter of an CB(Nylon) sample.

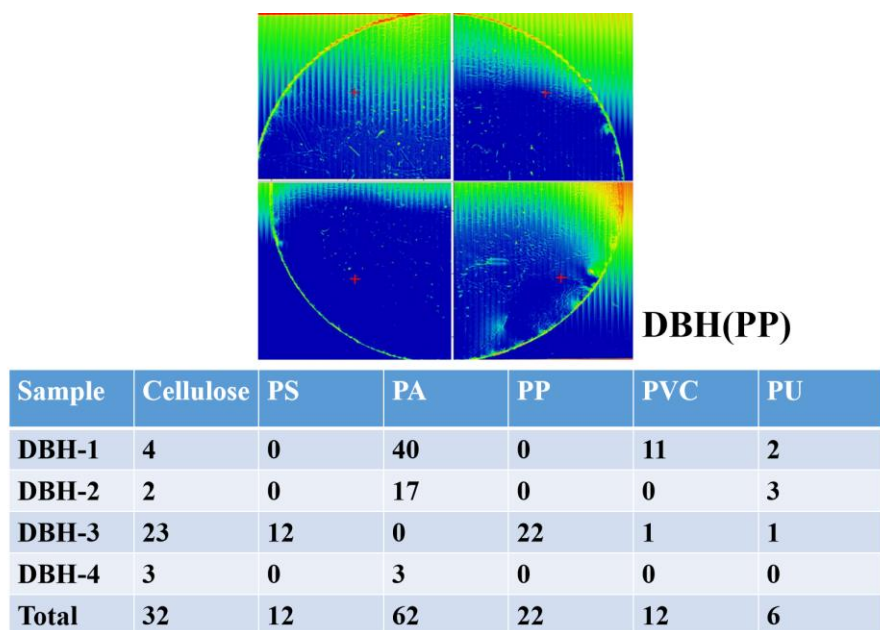

Figure S7. False color images of the entire membrane filter of an DBH(PP) sample.

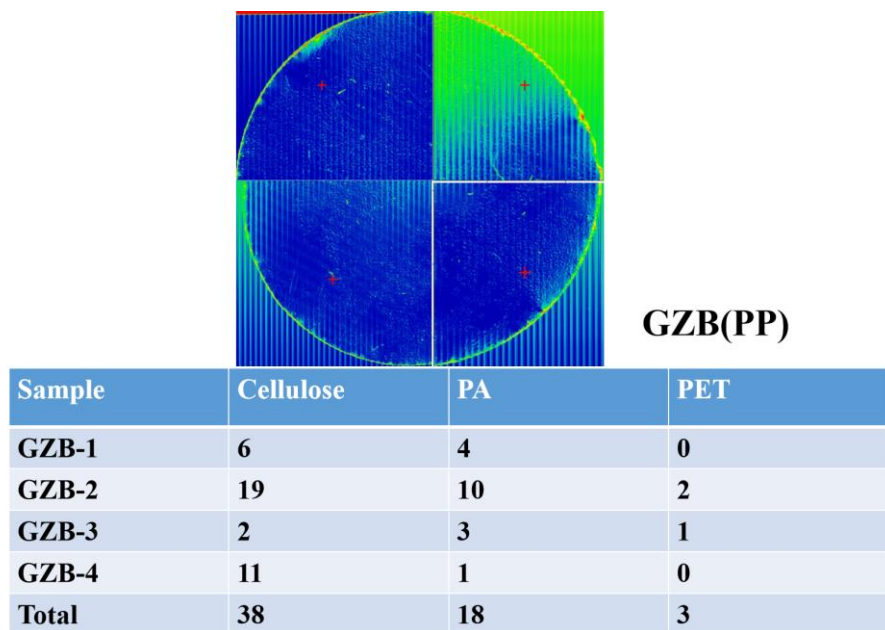

Figure S8. False color images of the entire membrane filter of an GZB(PP) sample.

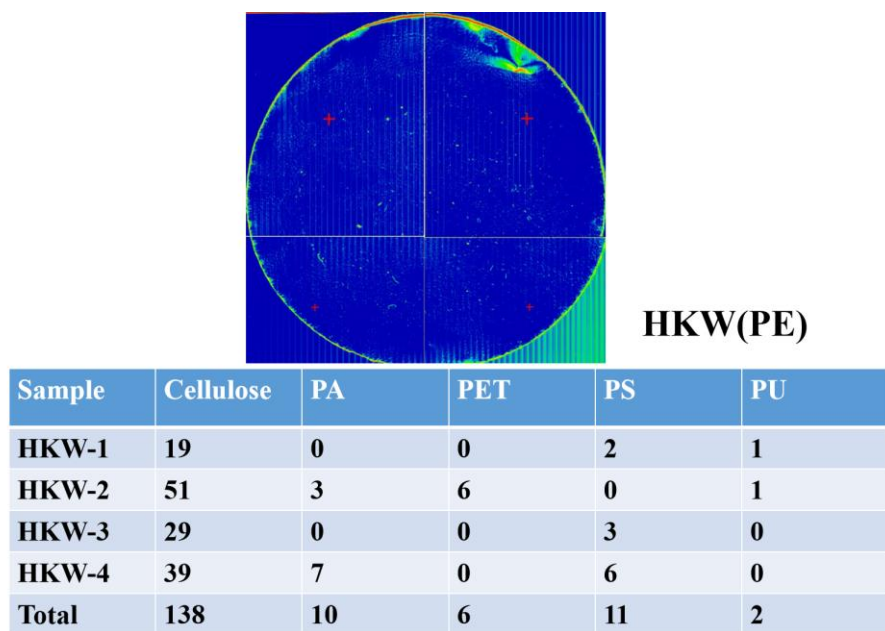

Figure S9. False color images of the entire membrane filter of an HKW(PE) sample.

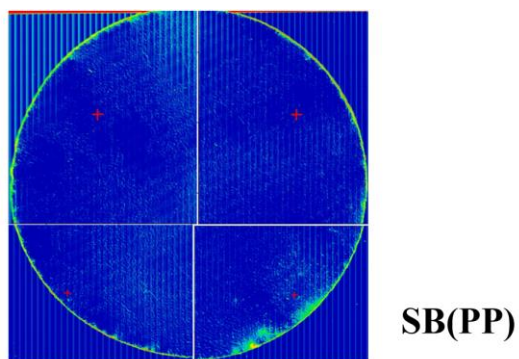

| Sample | Cellulose | PA | PVC | PS | PU |
|--------|-----------|----|-----|----|----|
| SB-1   | 0         | 0  | 0   | 0  | 3  |
| SB-2   | 5         | 0  | 6   | 0  | 0  |
| SB-3   | 0         | 0  | 0   | 1  | 1  |
| SB-4   | 3         | 3  | 0   | 0  | 3  |
| Total  | 8         | 3  | 6   | 1  | 7  |

Figure S10. False color images of the entire membrane filter of an SB(PP) sample.

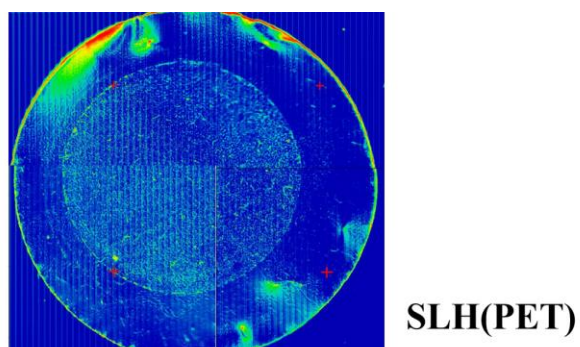

| Sample | Cellulose | PET | PVC | PS | PU  | PA  | PP |
|--------|-----------|-----|-----|----|-----|-----|----|
| SB-1   | 245       | 23  | 0   | 1  | 121 | 56  | 18 |
| SB-2   | 134       | 0   | 0   | 0  | 0   | 91  | 0  |
| SB-3   | 35        | 2   | 0   | 1  | 51  | 15  | 0  |
| SB-4   | 82        | 11  | 1   | 0  | 94  | 67  | 0  |
| Total  | 496       | 36  | 1   | 2  | 266 | 229 | 18 |

Figure S11. False color images of the entire membrane filter of an SLH(PET) sample.
